# Supplementary material for: Preparing Enteral Formulas for Adult Patients with Phenylketonuria: A Minor Necessity but Major Challenge—A Case Report
Source: MDPI journal article supplement (doi:10.3390/jcm12237452), 2023-12-01
Supplement: s1 [file s1]

Supplementary Table S1. Composition of dietary products used for the EN plan.

|                                            | Phenyl-free 2HP®                                                            | PKU sphere 15®                                                                                 | Fresubin Original Fibre<br>EasyBag®                                                                     | Duocal®                                                                                              | Prozero®                                                       |
|--------------------------------------------|-----------------------------------------------------------------------------|------------------------------------------------------------------------------------------------|---------------------------------------------------------------------------------------------------------|------------------------------------------------------------------------------------------------------|----------------------------------------------------------------|
| <b>Manufacturer</b>                        | Reckitt Benckiser Group PLC,<br>Slough, United Kingdom.                     | Vitafo a Nestlé Health Science<br>Company, Vevey, Switzerland.                                 | Fresenius Kabi, Bad Homburg,<br>Germany.                                                                | Nutricia N.V., Zoetermeer, The<br>Netherlands.                                                       | Vitafo a Nestlé Health Science<br>Company, Vevey, Switzerland. |
| <b>Description</b>                         | Vanilla flavored high-protein<br>Phe-free L-amino acid<br>powdered formula. | Vanilla flavored low-Phe<br>powdered formula containing<br>casein glycomacropeptide<br>(CGMP). | Unflavored liquid intended<br>for the dietary management of<br>any patients at risk of<br>malnutrition. | A high-energy powdered<br>product that contains a dual<br>energy source of<br>carbohydrates and fat. | Protein-free, liquid blend of<br>carbohydrate and fat.         |
| <b>Energy (Kcal)</b>                       | <b>390.0</b>                                                                | <b>338.0</b>                                                                                   | <b>100.0</b>                                                                                            | <b>492.0</b>                                                                                         | <b>67.0</b>                                                    |
| <b>Protein equivalents (g)</b>             | <b>40.0 (Phe 0.0 mg)</b>                                                    | <b>56.0 (Phe 104 mg)</b><br>CGMP to AA ratio of 60:40                                          | <b>3.8 (Phe 210 mg)</b><br>40% casein; 10%<br>lactoprotein; 50% soya                                    | <b>0.0 (Phe 0 mg)</b>                                                                                | <b>0.0 (Phe 0 mg)</b>                                          |
| <b>Carbohydrates (g)</b>                   | <b>44.0</b>                                                                 | <b>18.0</b>                                                                                    | <b>13.8</b>                                                                                             | <b>72.7</b>                                                                                          | <b>8.1</b>                                                     |
| • Monosaccharides                          | -                                                                           | 1.6                                                                                            | 0.2                                                                                                     | 1.4                                                                                                  | 0.05                                                           |
| • Maltose                                  | -                                                                           | -                                                                                              | 0.7                                                                                                     | 5.1                                                                                                  | 0.25                                                           |
| • Sucrose                                  | 22.0                                                                        | 6.3                                                                                            | -                                                                                                       | -                                                                                                    | -                                                              |
| • Maltodextrin                             | -                                                                           | 3.4                                                                                            | *                                                                                                       | 7.3 (maltotriose)                                                                                    | 4.8                                                            |
| • Polysaccharides (e.g. starch)            | 21.3                                                                        | 10.4                                                                                           | 13.8 (no starch)*                                                                                       | 58.9                                                                                                 | 0.3                                                            |
| <b>Fibre (g)</b>                           | 0.0                                                                         | 0.0                                                                                            | 1.5                                                                                                     | 0.0                                                                                                  | 0.0                                                            |
| <b>Lipids (g)</b>                          | 6.3                                                                         | 4.5                                                                                            | 3.4                                                                                                     | 22.3                                                                                                 | 3.8                                                            |
| <b>Osmolality (mOsm/Kg H<sub>2</sub>O)</b> | Dilution 1:4 = 1070<br>mOsm/L (osmolality)                                  | 770                                                                                            | 330                                                                                                     | Dilution 1:4 = 196; 1:3 =<br>310; 1:2 = 525                                                          | 200                                                            |

The nutritional information of dietary products is expressed per 100g or 100mL. The carbohydrate profile is expressed in g/100 g or 100 mL unless otherwise specified.

\*Information regarding oligo and polysaccharide content is provided as a whole. Only Fresubin Original Fibre EasyBottle® contains starch, but not the EasyBag® presentation.
